# Supplementary material for: Deep immunophenotyping at the single-cell level identifies a combination of anti-IL-17 and checkpoint blockade as an effective treatment in a preclinical model of data-guided personalized immunotherapy
Source: HighWire-hosted journal article supplement (doi:10.1136/jitc-2020-001358), 2020-10-01
Supplement: jitc-2020-001358supp001_data_supplement.xlsx [file jitc-2020-001358supp001_data_supplement.xlsx]

## Sheet: 44genes
	Supplementary Table 1. Genes analyzed in the single-cell RNA-Seq
	No.	Function	Official Symbol	Official Full Name	NCBI Gene ID	Seq.
	1	Lineage marker	Cd3e	CD3 antigen, epsilon polypeptide	12501	NM_007648.4
	2	Lineage marker	Cd4	CD4 antigen	12504	NM_013488.2
	3	Lineage marker	Cd8a	CD8 antigen, alpha chain	12525	NM_001081110.2
	4	Lineage marker	Cd8b1	CD8 antigen, beta chain 1	12526	NM_009858.2
	5	Cytokine	Ifng	interferon gamma	15978	NM_008337.4
	6	Cytokine	Tnf	tumor necrosis factor	21926	NM_013693.3
	7	Cytokine	Il10	interleukin 10	16153	NM_010548.2
	8	Cytokine	Il17a	interleukin 17A	16171	NM_010552.3
	9	Cytokine	Tgfb	transforming growth factor, beta 1	21803	NM_011577.2
	10	Cytokine receptor	Il7r	interleukin 7 receptor	16197	NM_008372.4
	11	Cytokine receptor	Il2rb	interleukin 2 receptor, beta chain	16185	NM_008368.4
	12	Cytokine receptor	Il2rg	interleukin 2 receptor, gamma chain	16186	NM_013563.4
	13	Cytotoxicmolecule	Gzmb	granzyme B	14939	NM_013542.2
	14	Cytotoxicmolecule	Prf1	perforin 1 (pore forming protein)	18646	NM_011073.3
	15	Cytotoxicmolecule	Fasl	Fas ligand (TNF superfamily, member 6)	14103	NM_010177.4
	16	Transcription factor	Tbx21	T-box 21	57765	NM_019507.2
	17	Transcription factor	Rorc	RAR-related orphan receptor gamma	19885	NM_011281.3
	18	Transcription factor	Batf	basic leucine zipper transcription factor, ATF-like	53314	NM_016767.2.
	19	Transcription factor	Eomes	eomesodermin homolog (Xenopus laevis)	13813	NM_010136.3
	20	Transcription factor	Foxp3	forkhead box P3	20371	NM_054039.2
	21	Transcription factor	Runx3	runt related transcription factor 3	12399	NM_019732.2.
	22	Transcription factor	Bcl2	B cell leukemia/lymphoma 2	12043	NM_009741.5
	23	Transcription factor	Bcl-6	B cell leukemia/lymphoma 6	12053	NM_009744.3.
	24	Transcription factor	Prdm1	PR domain containing 1, with ZNF domain	12142	NM_007548.4
	25	Transcription factor	Zeb2	zinc finger E-box binding homeobox 2	24136	NM_001289521.1
	26	Transcription factor	Tbp	TATA-binding protein	21374	NM_013684
	27	Chemokine receptor	Cxcr3	chemokine (C-X-C motif) receptor 3	12766	NM_009910.3
	28	Apoptosis	Fas	Fas (TNF receptor superfamily member 6)	14102	NM_007987.2
	29	glucose transporter	Slc2a1	solute carrier family 2 (facilitated glucose transporter), member 1	20525	NM_011400.3
	30	fatty acid synthesis	Acaca	acetyl-Coenzyme A carboxylase alpha	107476	NM_133360.2
	31	hypoxia	Hif-1a	hypoxia inducible factor 1, alpha subunit	15251	NM_010431.2
	32	Inhibitory receptor	Klrg1	killer cell lectin-like receptor subfamily G, member 1	50928	NM_016970.1
	33	Inhibitory receptor	Pdcd1	programmed cell death 1	18566	NM_008798.2
	34	Inhibitory receptor	Ctla4	cytotoxic T-lymphocyte-associated protein 4	12477	NM_009843.4
	35	Inhibitory receptor	Lag3	lymphocyte-activation gene 3	16768	NM_008479.2
	36	Inhibitory receptor	Havcr2	hepatitis A virus cellular receptor 2	171285	NM_134250.2
	37	Inhibitory receptor	Btla	B and T lymphocyte associated	208154	NM_177584.3
	38	Inhibitory receptor	Cd160	CD160 antigen	54215	NM_001163496.1
	39	Inhibitory receptor	Cd244	CD244 natural killer cell receptor 2B4	18106	NM_018729.2
	40	Inhibitory receptor	Tigit	T cell immunoreceptor with Ig and ITIM domains	100043314	NM_001146325.1
	41	Inhibitory receptor	Vsir	V-set immunoregulatory receptor	74048	NM_001159572.1
	42	stimulatory receptor	Icos	inducible T cell co-stimulator	54167	NM_017480.2
	43	stimulatory receptor	Tnfrsf9	tumor necrosis factor receptor superfamily, member 9	21942	NM_001077509.1
	44	proliferation	Mki67	antigen identified by monoclonal antibody Ki 67	17345	NM_001081117.2
