# Supplementary material for: Deep immunophenotyping at the single-cell level identifies a combination of anti-IL-17 and checkpoint blockade as an effective treatment in a preclinical model of data-guided personalized immunotherapy
Source: HighWire-hosted journal article supplement (doi:10.1136/jitc-2020-001358), 2020-10-01
Supplement: jitc-2020-001358supp003_data_supplement.xlsx [file jitc-2020-001358supp003_data_supplement.xlsx]

## Sheet: Supplementary Table 2
	Supplementary Table 3. Primers for 1st PCR
	No.	Primer name	Sequence (5’→3')	Length (nt)	Direction
	1	1st primer_Cd3e	GCTAAGCCCTTTCCTACAGC	20	Forward (45plex)
	2	1st primer_Cd4	TTCTCTTAGAGTGAGGCTGGG	21
	3	1st primer_Cd8a	TGGAGAACATTCCTTAGCACCC	22
	4	1st primer_Cd8b1	CACAGAGTGGCTGAAGAACCA	21
	5	1st primer_Ifng	CTGACTAATTAGCCAAGACTGTG	23
	6	1st primer_Tnf	GAGGCTGGATAAGATCTCAGG	21
	7	1st primer_Il10	TTTAAGCTGTTTCCATTGGGG	21
	8	1st primer_Il17a	AGAATTGTCTGCCCTCCACA	20
	9	1st primer_Tgfb	TGCCAACTTCTGTCTGGGACCCT	23
	10	1st primer_Il7r	GTCACAATTTTGAATCCCTGCTG	23
	11	1st primer_Il2rb	ACGAAGAGGTCCTGATAAGACTG	23
	12	1st primer_Il2rg	TCCTAAGTGACGCTAACCTCC	21
	13	1st primer_Gzmb	GCAGGCCAATGGAACACCTC	20
	14	1st primer_Prf1	CCTACCATGCCAAGTGTCTGC	21
	15	1st primer_Fasl	TACAAGGGTGAGAAAGGAGGC	21
	16	1st primer_Tbx21	GGTCGGGGTGGGGAGTCCAG	20
	17	1st primer_Rorc	TCCTGAGACTTTTCTGCCTTTC	22
	18	1st primer_Batf	GAGGTGGTATACAGTGCCCAT	21
	19	1st primer_Eomes	TTGTTGTAGGGCTGGCTCTGT	21
	20	1st primer_Foxp3	CTATGCCCCTATAAGACCACCCT	23
	21	1st primer_Runx3	CAGTGAGCACAGGCAGCTGGG	21
	22	1st primer_Bcl2	AGGATTGATGGCAGATTCAGT	21
	23	1st primer_Bcl-6	GACTATTTTAAGTATTGCGTCTGT	24
	24	1st primer_Prdm1	GCAGCCCCAACAAGACTGACA	21
	25	1st primer_Cxcr3	CGCAGCCCAAGTCCTAACACA	21
	26	1st primer_Fas	GAGAGAGCCTGCCACCCAT	19
	27	1st primer_Slc2a1	CCTCGGCACCATAGGGGTC	19
	28	1st primer_Acaca	TCTCTGGCCTCCACTTTTGCT	21
	29	1st primer_Hif-1a	TGCAGTATGAATGGAGTAAGTGA	23
	30	1st primer_Klrg1	TCATGTGCTCACTCCTGCTT	20
	31	1st primer_Pdcd1	TGATGAAGACTTGAAAAGCTCCT	23
	32	1st primer_Ctla4	GGCTCAGTTGCATAAACCGAT	21
	33	1st primer_Lag3	GTACGCCGCAGAGTCTAGCTCA	22
	34	1st primer_Havcr2	AATATTCTTTGGGAGGACAGTCG	23
	35	1st primer_Btla	CCCTTTTCTATTGCACTCCAC	21
	36	1st primer_Cd160	ATGAACAGAGAAGTCATTTGCC	22
	37	1st primer_Cd244	GCCAGATGTCAGTCTTGTTCAC	22
	38	1st primer_Tigit	CTGTGCTGGGACTCATTTGCT	21
	39	1st primer_Vsir	TGCCTTGGACTCAGGAAGGGAA	22
	40	1st primer_Icos	CCTCTAGTCTTTGGTCTGCAT	21
	41	1st primer_Tnfrsf9	TTTGAGGGGAATCTTCAGAGC	21
	42	1st primer_Zeb2	GAGACATTTGTGATGTTGGCTGT	23
	43	1st primer_Tbp	GCAGCACTACTGTGAGTTGCTT	22
	44	1st primer _Mki67	AAACTAGAGTCGCTTTGGACAG	22
	45	1st primer Luciferase	ATTCCTCTGGATCTACTGGGTT	22
	46	CS primer	CCATCTCATCCCTGCGTGTCT	21	Reverse
