# Supplementary material for: Deep immunophenotyping at the single-cell level identifies a combination of anti-IL-17 and checkpoint blockade as an effective treatment in a preclinical model of data-guided personalized immunotherapy
Source: HighWire-hosted journal article supplement (doi:10.1136/jitc-2020-001358), 2020-10-01
Supplement: jitc-2020-001358supp004_data_supplement.xlsx [file jitc-2020-001358supp004_data_supplement.xlsx]

## Sheet: Supplementary Table3
	Supplementary Table 4. Primers for 2nd PCR
	No.	Primer name	Sequence (5’→3')	Length (nt)	Direction
	1	2nd primer R2SP_Cd3e	GTGACTGGAGTTCAGACGTGTGCTCTTCCGATCTTTTTATTCCCTTCCCGGCCCAT	56	Forward (45plex)
	2	2nd primer R2SP_Cd4	GTGACTGGAGTTCAGACGTGTGCTCTTCCGATCTGTGCAGAGCCTGGGAAGTGGA	55
	3	2nd primer R2SP_Cd8a	GTGACTGGAGTTCAGACGTGTGCTCTTCCGATCTTGTAAAGAGGCAGACTAGACGTGG	58
	4	2nd primer R2SP_Cd8b1	GTGACTGGAGTTCAGACGTGTGCTCTTCCGATCTGACTGGGCCTTGGACAGTGG	54
	5	2nd primer R2SP_Ifng	GTGACTGGAGTTCAGACGTGTGCTCTTCCGATCTGATTGCGGGGTTGTATCTGGG	55
	6	2nd primer R2SP_Tnf	GTGACTGGAGTTCAGACGTGTGCTCTTCCGATCTGCAATGCACAGCCTTCCTCACA	56
	7	2nd primer R2SP_Il10	GTGACTGGAGTTCAGACGTGTGCTCTTCCGATCTTTATATGATGGGAGGGGTTCTTC	57
	8	2nd primer R2SP_Il17a	GTGACTGGAGTTCAGACGTGTGCTCTTCCGATCTGAAGGTGTAAAGGGGTCCCAA	55
	9	2nd primer R2SP_Tgfb	GTGACTGGAGTTCAGACGTGTGCTCTTCCGATCTGGACCCTGCCCCTATATTTGGAG	57
	10	2nd primer R2SP_Il7r	GTGACTGGAGTTCAGACGTGTGCTCTTCCGATCTGATACTGTGGTTGGGTGCCTT	55
	11	2nd primer R2SP_Il2rb	GTGACTGGAGTTCAGACGTGTGCTCTTCCGATCTCTCGTAGAAGGAGGGGTTGGG	55
	12	2nd primer R2SP_Il2rg	GTGACTGGAGTTCAGACGTGTGCTCTTCCGATCTCCAATGCTCACTGCCTTCCCT	55
	13	2nd primer R2SP_Gzmb	GTGACTGGAGTTCAGACGTGTGCTCTTCCGATCTACCATGCTGTGACAACCCAACTGA	58
	14	2nd primer R2SP_Prf1	GTGACTGGAGTTCAGACGTGTGCTCTTCCGATCTCGCAGTGGGGCTGTGTGGTAA	55
	15	2nd primer R2SP_Fasl	GTGACTGGAGTTCAGACGTGTGCTCTTCCGATCTCAGTGTCTCATTGGCACCATC	55
	16	2nd primer R2SP_Tbx21	GTGACTGGAGTTCAGACGTGTGCTCTTCCGATCTAGCCAAACAGAGAAGACTCAGGTGAC	60
	17	2nd primer R2SP_Rorc	GTGACTGGAGTTCAGACGTGTGCTCTTCCGATCTCCTCTGCCTGTTTTCTGGGAC	55
	18	2nd primer R2SP_Batf	GTGACTGGAGTTCAGACGTGTGCTCTTCCGATCTTGCCTTCCACCAGCCTCACATCA	57
	19	2nd primer R2SP_Eomes	GTGACTGGAGTTCAGACGTGTGCTCTTCCGATCTAAATTTGGTGCTTTGGCGTTGTAA	58
	20	2nd primer R2SP_Foxp3	GTGACTGGAGTTCAGACGTGTGCTCTTCCGATCTCAACAGTGCACCTAAAGGACTCA	57
	21	2nd primer R2SP_Runx3	GTGACTGGAGTTCAGACGTGTGCTCTTCCGATCTAAAGGGTCCTTATTTGCAAGGCTAC	59
	22	2nd primer R2SP_Bcl2	GTGACTGGAGTTCAGACGTGTGCTCTTCCGATCTTTTCCTTTGGAGACAGGGGTTCTCTA	60
	23	2nd primer R2SP_Bcl-6	GTGACTGGAGTTCAGACGTGTGCTCTTCCGATCTTTTGTCTAAAATGCCTCCGTGT	56
	24	2nd primer R2SP_Prdm1	GTGACTGGAGTTCAGACGTGTGCTCTTCCGATCTCCAAAGCATGACCTGACATTGACACC	60
	25	2nd primer R2SP_Cxcr3	GTGACTGGAGTTCAGACGTGTGCTCTTCCGATCTAGTGCTTGTCCTCCTTGTAGTTGGG	59
	26	2nd primer R2SP_Fas_	GTGACTGGAGTTCAGACGTGTGCTCTTCCGATCTATTGACATTGGCAACTCCTGGTG	57
	27	2nd primer R2SP_Slc2a1	GTGACTGGAGTTCAGACGTGTGCTCTTCCGATCTTTAGGATTCGCCCATTCCTGTC	56
	28	2nd primer R2SP_Acaca	GTGACTGGAGTTCAGACGTGTGCTCTTCCGATCTCCCCGGTGGTATGAAAGCTG	54
	29	2nd primer R2SP_Hif-1a	GTGACTGGAGTTCAGACGTGTGCTCTTCCGATCTATCTGTTCCCATTAGCAGGTGA	56
	30	2nd primer R2SP_Klrg1	GTGACTGGAGTTCAGACGTGTGCTCTTCCGATCTCTTGTGCCTGAGCTGTAGGGA	55
	31	2nd primer R2SP_Pdcd1	GTGACTGGAGTTCAGACGTGTGCTCTTCCGATCTCCGTGAGCGTATCTGCTGTCC	55
	32	2nd primer R2SP_Ctla4	GTGACTGGAGTTCAGACGTGTGCTCTTCCGATCTATGGTGATGGAGTGTAAACTGGG	57
	33	2nd primer R2SP_Lag3	GTGACTGGAGTTCAGACGTGTGCTCTTCCGATCTACCTTAAAGGAGGCCATCTCGT	56
	34	2nd primer R2SP_Havcr2	GTGACTGGAGTTCAGACGTGTGCTCTTCCGATCTGACCTCAGTTTCATCTGGCTT	55
	35	2nd primer R2SP_Btla	GTGACTGGAGTTCAGACGTGTGCTCTTCCGATCTTCTCTCATTGAACCTGGAGCTCTG	58
	36	2nd primer R2SP_Cd160	GTGACTGGAGTTCAGACGTGTGCTCTTCCGATCTCAACACCACATCCAAATACAGGG	57
	37	2nd primer R2SP_Cd244	GTGACTGGAGTTCAGACGTGTGCTCTTCCGATCTTCCTTCATCCCTGTACATGCCTAG	58
	38	2nd primer R2SP_Tigit	GTGACTGGAGTTCAGACGTGTGCTCTTCCGATCTCTATAGAAAGTGGCCTTGGGAG	56
	39	2nd primer R2SP_Vsir	GTGACTGGAGTTCAGACGTGTGCTCTTCCGATCTCTTCCCAAAAGATTTCCACGTGTGT	59
	40	2nd primer R2SP_Icos	GTGACTGGAGTTCAGACGTGTGCTCTTCCGATCTATCTTCCCCTGGCTTCTAGGATGTATG	61
	41	2nd primer R2SP_Tnfrsf9	GTGACTGGAGTTCAGACGTGTGCTCTTCCGATCTGCCTGCTTCTCCTGTTTCCTC	55
	42	2nd primer R2SP_Zeb2	GTGACTGGAGTTCAGACGTGTGCTCTTCCGATCTAATCTTTGTTACCTTCGCTGTGA	57
	43	2nd primer R2SP_Tbp	GTGACTGGAGTTCAGACGTGTGCTCTTCCGATCTCTTGCTCTGTGCTGCTACTTGGG	57
	44	2nd primer R2SP_Mki	GTGACTGGAGTTCAGACGTGTGCTCTTCCGATCTACCTAAGCCAAGGGTAACTCG	55
	45	2nd primer R2SP_Luciferase	GTGACTGGAGTTCAGACGTGTGCTCTTCCGATCTCTGCCTGCGTCAGATTCTCG	54
	46	CS primer	CCATCTCATCCCTGCGTGTCT	21	Reverse
