# Supplementary material for: Deep immunophenotyping at the single-cell level identifies a combination of anti-IL-17 and checkpoint blockade as an effective treatment in a preclinical model of data-guided personalized immunotherapy
Source: HighWire-hosted journal article supplement (doi:10.1136/jitc-2020-001358), 2020-10-01
Supplement: jitc-2020-001358supp005_data_supplement.xlsx [file jitc-2020-001358supp005_data_supplement.xlsx]

## Sheet: Supplementary Table 4
	Supplementary Table 5. Primers for 3rd PCR
	No.	Primer name	Sequence (5’→3')	Length (nt)	Direction
	1	P7_R2SP	CAAGCAGAAGACGGCATACGAGATGTGACTGGAGTTCAGACGTGT	45	Forward
	2	P5_R1SP_chip1_CS	AATGATACGGCGACCACCGAGATCTACACTCTTTCCCTACACGACGCTCTTCCGATCTCGATACCATCTCATCCCTGCGTGTCTC	85	Reverse
	3	P5_R1SP_chip2_CS	AATGATACGGCGACCACCGAGATCTACACTCTTTCCCTACACGACGCTCTTCCGATCTTATCGCCATCTCATCCCTGCGTGTCTC	85	Reverse
	4	P5_R1SP_chip3_CS	AATGATACGGCGACCACCGAGATCTACACTCTTTCCCTACACGACGCTCTTCCGATCTATACGCCATCTCATCCCTGCGTGTCTC	85	Reverse
	5	P5_R1SP_chip4_CS	AATGATACGGCGACCACCGAGATCTACACTCTTTCCCTACACGACGCTCTTCCGATCTTACGCCCATCTCATCCCTGCGTGTCTC	85	Reverse
	6	P5_R1SP_chip5_CS	AATGATACGGCGACCACCGAGATCTACACTCTTTCCCTACACGACGCTCTTCCGATCTGTACGCCATCTCATCCCTGCGTGTCTC	85	Reverse
	7	P5_R1SP_chip6_CS	AATGATACGGCGACCACCGAGATCTACACTCTTTCCCTACACGACGCTCTTCCGATCTCGCTACCATCTCATCCCTGCGTGTCTC	85	Reverse
	8	P5_R1SP_chip7_CS	AATGATACGGCGACCACCGAGATCTACACTCTTTCCCTACACGACGCTCTTCCGATCTTAGCGCCATCTCATCCCTGCGTGTCTC	85	Reverse
	9	P5_R1SP_chip8_CS	AATGATACGGCGACCACCGAGATCTACACTCTTTCCCTACACGACGCTCTTCCGATCTCTACGCCATCTCATCCCTGCGTGTCTC	85	Reverse
	10	P5_R1SP_chip9_CS	AATGATACGGCGACCACCGAGATCTACACTCTTTCCCTACACGACGCTCTTCCGATCTGATCGCCATCTCATCCCTGCGTGTCTC	85	Reverse
	11	P5_R1SP_chip10_CS	AATGATACGGCGACCACCGAGATCTACACTCTTTCCCTACACGACGCTCTTCCGATCTATCGCCCATCTCATCCCTGCGTGTCTC	85	Reverse
	12	P5_R1SP_chip11_CS	AATGATACGGCGACCACCGAGATCTACACTCTTTCCCTACACGACGCTCTTCCGATCTCGTCGCCATCTCATCCCTGCGTGTCTC	85	Reverse
	13	P5_R1SP_chip12_CS	AATGATACGGCGACCACCGAGATCTACACTCTTTCCCTACACGACGCTCTTCCGATCTCGACGCCATCTCATCCCTGCGTGTCTC	85	Reverse
