# Supplementary material for: Deep immunophenotyping at the single-cell level identifies a combination of anti-IL-17 and checkpoint blockade as an effective treatment in a preclinical model of data-guided personalized immunotherapy
Source: HighWire-hosted journal article supplement (doi:10.1136/jitc-2020-001358), 2020-10-01
Supplement: jitc-2020-001358supp006_data_supplement.xlsx [file jitc-2020-001358supp006_data_supplement.xlsx]

## Sheet: DEGs high in YTN2
Supplementary Table 6. DEGs highly expressed in YTN2
gene_id	log2FC	FDR
Khdrbs3	-2.77007	3.24216e-75
Cxcl15	-5.999	1.59225e-64
Ms4a4c	-2.81787	1.25743e-62
Ddx3y	-6.43194	2.67132e-44
Kdm5d	-6.97419	2.54202e-42
St6galnac2	-2.36588	2.63208e-42
Cst7	-2.05644	1.80803e-40
Hat1	-1.46778	1.11887e-36
Hhex	-1.8194	1.79363e-36
Psma4	-0.873537	1.9274e-35
Uty	-5.79008	1.37092e-34
Slfn9	-1.94641	1.89831e-34
Nrg1	-2.31448	1.29661e-33
H2-T22	-1.78839	1.56409e-33
Il18rap	-1.84958	4.35174e-33
Rp2h	-1.03118	1.93455e-32
Ppef1	-3.92502	5.62011e-32
Smchd1	-1.17114	7.4906e-32
Ets1	-0.752345	1.40155e-31
Gm1966	-1.92554	3.29441e-31
Cd244	-1.16863	3.08435e-30
P2ry14	-2.32095	3.49218e-29
Cers6	-1.32255	4.95189e-29
Serpinb1b	-2.50408	8.0344e-29
Gm6093	-4.25777	1.00383e-28
Gm8300	-5.9624	1.16282e-28
Ly6c2	-2.99703	3.26719e-28
Htr7	-2.7682	3.39398e-28
Il12rb2	-2.93681	1.40236e-27
Notum	-4.31117	2.50174e-27
Pak3	-2.12598	3.05427e-27
B3gnt5	-3.49553	5.71486e-27
Ifit1bl1	-2.85744	8.47122e-27
Lacc1	-1.12434	9.21671e-27
Stat4	-2.08496	1.50834e-26
Ptprc	-1.66007	3.01235e-26
Eif2s3y	-5.91934	1.13727e-25
Chst15	-1.24305	1.13727e-25
Il2rg	-1.73105	1.39412e-25
Pira6	-3.34542	1.77293e-25
Lims1	-0.664583	1.90892e-25
Mcpt8	-3.30301	2.28808e-25
Gm15056	-5.82502	4.32591e-25
Dennd1b	-0.88521	1.18092e-24
Stac	-3.36216	1.54476e-24
Fas	-2.33273	2.43762e-24
Gzmb	-2.7509	3.87271e-24
AI662270	-1.22369	5.01806e-24
Rtf1	-0.557967	1.94345e-23
Snw1	-0.707688	3.16503e-23
Crnkl1	-0.813592	3.48255e-23
Fgl2	-2.15707	6.24371e-23
Cysltr2	-1.59007	7.6363e-23
Tmem123	-1.05413	1.02131e-22
2810474O19Rik	-1.29723	1.10873e-22
Igsf6	-2.06416	1.11195e-22
Rasgrp1	-1.64384	1.23721e-22
Pcdh15	-3.68218	1.79002e-22
Eif2ak2	-1.04196	1.885e-22
Tmem243	-1.19945	2.68996e-22
Ptpn22	-1.55098	4.68094e-22
Sub1	-1.03123	7.13232e-22
Cd2ap	-0.708391	7.16336e-22
Grm6	-2.71861	8.20619e-22
Stfa3	-6.25855	1.55925e-21
Gpr141	-3.40844	1.82698e-21
E330013P04Rik	-2.44801	2.12437e-21
Pira2	-1.96007	3.11075e-21
Ifit1bl2	-3.10973	6.3703e-21
Pax2	-2.65909	6.91832e-21
Ogfrl1	-1.3425	8.22555e-21
Stk4	-0.847768	1.19013e-20
Rbl1	-1.41548	1.73624e-20
Pyhin1	-2.22726	1.93023e-20
Fam3c	-1.37201	2.15918e-20
Samhd1	-1.77939	2.61866e-20
Apol6	-2.72533	4.34088e-20
Arhgap15	-1.29568	5.21777e-20
Slc39a10	-1.17635	5.4072e-20
Gm9733	-3.19496	6.94654e-20
C330007P06Rik	-0.721636	8.43899e-20
Dnajc7	-0.563634	8.56234e-20
Ppp6r3	-0.431513	1.35172e-19
Zc3h12d	-1.46749	1.83709e-19
B2m	-1.42759	2.42509e-19
Gm5662	-4.68139	2.57071e-19
Snrpb2	-0.935424	3.06548e-19
5430427O19Rik	-1.52803	3.25458e-19
Phf11c	-1.19834	3.32755e-19
Rnaseh2b	-0.98341	4.61648e-19
Fam49b	-1.2605	5.15599e-19
Casp8ap2	-0.811864	6.126e-19
Irf2	-0.829919	8.57265e-19
Fgr	-1.40249	1.36593e-18
Nog	-3.38107	1.42134e-18
Slamf6	-1.88268	1.60792e-18
Dnajc15	-0.918337	1.70492e-18
Skiv2l2	-0.675319	1.77042e-18
Epsti1	-1.45035	1.91967e-18
Atp1b3	-1.22302	1.97271e-18
Gzma	-2.88028	2.00288e-18
Klrb1b	-2.60232	2.00288e-18
Slc4a11	-4.05763	2.1424e-18
Vcpip1	-0.862431	3.34714e-18
Plbd1	-1.34062	3.75496e-18
Pin4	-0.70323	3.75496e-18
Sumo2	-0.614326	4.12055e-18
Sorl1	-0.978111	5.14297e-18
Ifitm1	-1.73738	5.60281e-18
Kcnj15	-2.15967	6.79464e-18
Rock1	-0.95259	8.62495e-18
Dr1	-0.886312	9.97644e-18
Ikzf1	-1.18106	1.25991e-17
Tcea1	-0.622168	1.28358e-17
Birc6	-0.471089	1.41811e-17
Klra14-ps	-2.45107	1.86687e-17
Dock11	-0.807827	1.94721e-17
Gng2	-0.92713	2.19312e-17
Jak2	-1.17256	2.29661e-17
Prpf38a	-0.815785	2.39174e-17
1600014C10Rik	-1.23016	2.40352e-17
Xrn2	-0.619881	2.73228e-17
Creb1	-0.81942	3.03574e-17
Cd86	-1.50884	3.12974e-17
Ppp2r5a	-0.601458	4.20129e-17
Rab11fip2	-1.18655	4.72051e-17
Mcemp1	-2.06219	5.87749e-17
Rab19	-1.63576	5.96473e-17
Rspo3	-3.08776	6.25514e-17
Lpcat2	-1.56947	6.6877e-17
Ppp3cc	-0.847764	7.38574e-17
Casp3	-0.731007	9.0999e-17
Ostm1	-0.971252	1.54756e-16
Jade3	-1.47786	1.74637e-16
Sell	-2.72778	1.89268e-16
Pstpip2	-1.58763	2.30868e-16
Terf1	-1.19225	3.0657e-16
Kat2b	-0.742238	3.30581e-16
Tlk1	-0.787376	4.27357e-16
Chd1	-0.804255	4.73385e-16
Ahr	-1.09932	4.78255e-16
Gpr15	-2.22863	4.85286e-16
Zfp281	-0.846721	5.27325e-16
Kpna3	-0.670845	5.37793e-16
Ptpro	-1.19734	5.42358e-16
Cd52	-1.27365	6.27221e-16
Psma1	-0.715443	7.4669e-16
Klra1	-1.59874	7.72876e-16
Vps54	-1.10474	7.96592e-16
Clec5a	-2.10516	9.47627e-16
H2-T24	-1.70224	1.01136e-15
Brcc3	-0.631773	1.18075e-15
Fcgr4	-1.63673	1.6546e-15
Etv6	-0.888051	1.70655e-15
Fam49a	-1.64636	1.71023e-15
Ly6i	-4.09865	1.7431e-15
Sp100	-1.39644	1.88906e-15
Exoc6	-0.576675	1.91977e-15
Lrat	-2.75247	1.99918e-15
Mctp2	-1.84716	2.06721e-15
Klra8	-2.25686	2.1272e-15
Olfr56	-1.88014	2.1363e-15
Ms4a4b	-2.29472	2.5825e-15
Hypk	-0.568649	2.99534e-15
Clasp2	-0.789215	3.0668e-15
AB124611	-1.55009	3.06825e-15
Gimap9	-1.41897	3.11691e-15
Alms1	-0.830282	3.33853e-15
Itga4	-1.27498	3.38726e-15
Clec7a	-2.03181	4.49703e-15
Mapk9	-0.518451	5.95934e-15
Ddhd1	-0.892045	6.44732e-15
Hdc	-1.83953	8.63986e-15
Aif1	-1.44163	9.08587e-15
Chmp1b	-0.566958	9.80489e-15
Ptpn6	-1.25602	1.07528e-14
Ripk1	-0.675335	1.13803e-14
Nin	-0.738673	1.1609e-14
Zfp455	-0.91431	1.20615e-14
1700071M16Rik	-1.92656	1.24826e-14
Serpinb9b	-2.65504	1.28209e-14
Klra2	-2.50453	1.32239e-14
Rel	-0.71881	1.38963e-14
Cacybp	-0.982195	1.49195e-14
Hrh2	-2.05083	1.49195e-14
Ranbp2	-0.926912	1.561e-14
Ctss	-1.14521	1.64571e-14
Greb1l	-1.88399	1.67399e-14
4930453N24Rik	-0.664143	1.67399e-14
Hnrnph2	-0.861403	1.95084e-14
Gdpd2	-3.36634	1.95584e-14
Sp110	-1.31722	2.43252e-14
Trim34a	-1.25961	2.43716e-14
Morc3	-0.604301	2.59752e-14
Ccl5	-2.45042	2.64008e-14
Tlr9	-1.61336	2.6715e-14
Hck	-1.61344	2.88409e-14
Atrx	-0.865421	3.04537e-14
Lipa	-1.15535	3.54214e-14
Slfn3	-1.00125	3.54849e-14
Scimp	-1.80747	3.64277e-14
Gpr171	-1.76041	3.90575e-14
Cd2	-1.8286	4.07668e-14
Slfn8	-1.85762	5.24113e-14
Mefv	-1.89487	5.27337e-14
Abracl	-0.909391	5.47533e-14
Bcl2l11	-0.876239	5.80567e-14
Mgat4a	-1.06942	7.59185e-14
Atp8b4	-1.5361	7.64909e-14
Sp140	-1.33413	7.79836e-14
Malt1	-1.61062	7.99103e-14
Zbp1	-1.59331	7.99589e-14
Gimap6	-1.62021	8.06943e-14
Rfc3	-1.29645	8.14998e-14
Tshz1	-0.907109	8.36945e-14
D930015E06Rik	-0.806395	8.54673e-14
Psma3	-0.747572	9.15643e-14
Fasl	-1.92566	9.71266e-14
Haus3	-1.05149	1.0878e-13
Zeb2os	-1.44216	1.10843e-13
Peli1	-1.29804	1.12654e-13
Tgs1	-0.693646	1.14941e-13
Ppig	-1.02847	1.21794e-13
Prkar2b	-1.22074	1.53584e-13
Hs3st3b1	-1.46814	1.57023e-13
BC028528	-1.31678	1.6365e-13
Prf1	-2.08237	1.85375e-13
Igf2bp3	-1.34887	1.89096e-13
Tfap2a	-3.39867	1.92253e-13
Hgf	-1.68809	2.04026e-13
Fuca2	-0.630783	2.0811e-13
Adgrg7	-3.08874	2.10763e-13
Gm8369	-2.11441	2.15696e-13
Psma7	-0.610145	2.19594e-13
Arfgef1	-0.592735	2.22926e-13
Col28a1	-2.47053	2.3032e-13
Lingo2	-7.06892	2.42422e-13
Gpr65	-1.48911	2.44914e-13
Ctla4	-2.25504	2.62165e-13
Slmo2	-0.768132	2.64843e-13
Ttc9c	-0.545802	3.17077e-13
I830077J02Rik	-1.40978	3.30638e-13
Pthlh	-1.73052	3.63364e-13
Fam98b	-0.83856	4.2678e-13
Sgk3	-1.04855	4.55094e-13
Stk17b	-0.859297	5.01247e-13
Cenpk	-1.28001	5.08276e-13
Tnfaip2	-1.74357	5.43955e-13
Utp14a	-0.573929	5.74666e-13
Ssb	-0.886976	6.07049e-13
Zufsp	-1.11454	6.5019e-13
Nmi	-1.1702	6.56386e-13
Zcchc2	-0.738259	7.56441e-13
Sectm1a	-2.43886	8.04361e-13
Msh3	-0.638068	8.13647e-13
Pla2g7	-1.81908	8.7946e-13
Cdc7	-0.716793	8.8223e-13
Klri2	-2.37531	8.99226e-13
Pnpt1	-0.774858	9.02278e-13
Mybl1	-1.54023	1.12364e-12
Cd200r4	-1.44679	1.19436e-12
Klrb1f	-1.6935	1.34396e-12
Smc1a	-0.702143	1.44536e-12
Vrk2	-0.916802	1.49188e-12
Baz1a	-0.815711	1.55891e-12
Slco1a5	-2.9879	1.63862e-12
Slfn2	-1.39311	1.63862e-12
Nod2	-1.74493	1.65097e-12
Phf11b	-1.58881	1.65137e-12
Tagap	-1.24026	1.79122e-12
Mb21d1	-1.13253	1.81864e-12
Stxbp3	-0.685576	2.09498e-12
LOC100038947	-2.05856	2.099e-12
Zfp800	-1.14957	2.32856e-12
Psmd10	-0.815417	2.66785e-12
Sv2c	-2.43664	3.06006e-12
Ms4a6b	-1.53752	3.33377e-12
Dek	-1.02676	3.36155e-12
Il2ra	-1.56507	3.54088e-12
Arl5c	-1.25839	3.72719e-12
Cd69	-2.3961	4.18237e-12
Magohb	-1.08287	4.49886e-12
Tbk1	-0.656068	5.09169e-12
Usp1	-0.925469	5.09169e-12
Naa20	-0.620252	5.32465e-12
Hectd1	-0.428167	5.56745e-12
Gbp2b	-3.41738	5.86891e-12
Psmd11	-0.421447	6.00191e-12
Eif5b	-0.707513	6.22179e-12
Arid5b	-0.686839	7.11959e-12
Ralgapb	-0.471919	7.32705e-12
Glrx	-1.57691	7.47474e-12
Rps6ka5	-0.880025	7.88268e-12
Actr3	-0.56369	7.99592e-12
Txk	-2.01349	8.25709e-12
Klrk1	-2.16175	8.41691e-12
Ggta1	-0.880623	8.6651e-12
Crlf3	-0.616201	8.80015e-12
Pdcd1lg2	-2.4293	9.04167e-12
Herc4	-0.516809	9.31204e-12
Slc29a3	-0.85382	9.31204e-12
Arid4a	-0.800632	9.53279e-12
Slco3a1	-1.39433	9.63602e-12
Stag2	-0.680283	1.03611e-11
Phf20l1	-0.636923	1.08537e-11
Pold3	-0.586755	1.08788e-11
Fkbp3	-0.5948	1.1728e-11
Prpf38b	-0.583719	1.1876e-11
Klrc1	-2.4733	1.1896e-11
Pydc4	-1.95684	1.19217e-11
Ms4a6c	-1.42147	1.23639e-11
Uvrag	-0.795676	1.31777e-11
Ep400	-0.42789	1.45297e-11
Synj1	-0.674303	1.45737e-11
Setdb2	-1.06959	1.49697e-11
Sirpb1b	-1.75651	1.54263e-11
BC094916	-2.48939	1.58458e-11
Irg1	-2.92019	1.62402e-11
Trim12c	-1.20472	1.66824e-11
Ralgps2	-0.626788	1.70565e-11
N4bp1	-1.06384	1.73204e-11
March5	-0.715699	1.75454e-11
Il27	-2.02247	1.79219e-11
Mmp25	-1.77407	1.82943e-11
Fcrl6	-2.67708	1.92329e-11
Wtap	-0.532296	1.93818e-11
Tor1aip1	-0.799477	2.09581e-11
2010300C02Rik	-1.41826	2.27222e-11
Uba1	-0.271533	2.30884e-11
Ifng	-3.56329	2.42165e-11
Sema3d	-1.1668	2.47702e-11
Ipcef1	-1.44747	2.56411e-11
Clec12a	-1.66842	2.58907e-11
Nab1	-0.934944	2.59249e-11
Cep112	-1.13997	2.70103e-11
BC147527	-1.57221	2.99617e-11
Rtp4	-1.44384	3.15657e-11
Supt16	-0.635256	3.17751e-11
Themis	-2.01284	3.17751e-11
Api5	-0.623906	3.55229e-11
Amica1	-1.49896	3.62094e-11
Atp11b	-0.978448	3.67641e-11
Slc30a1	-1.09192	3.6986e-11
Bcl2a1d	-1.40281	3.79258e-11
Mier1	-0.549198	3.92373e-11
Smek2	-0.599955	3.94521e-11
Rsbn1l	-0.837533	4.39006e-11
Lcp2	-1.31996	4.42453e-11
Atad2b	-0.706067	4.56724e-11
Ddx58	-0.8695	4.7981e-11
Rab8a	-0.403981	4.81309e-11
Plekhg1	-1.00965	4.96677e-11
Fam178a	-0.56534	5.08612e-11
Nup160	-0.736164	5.09566e-11
Gfod1	-1.19896	5.14623e-11
Ifit2	-1.86806	5.15082e-11
Tlr1	-0.894246	5.59493e-11
Senp1	-0.570519	5.59493e-11
Atg3	-0.523566	5.87791e-11
Cdca7l	-1.13766	6.0449e-11
Klrd1	-1.99858	6.22288e-11
Uimc1	-0.624833	6.27326e-11
Ctla2a	-0.98133	6.34108e-11
Actr2	-0.70496	6.36248e-11
Klra9	-2.14256	6.39005e-11
Tifab	-1.17003	7.17272e-11
Cyp4v3	-1.15948	7.79963e-11
Slbp	-0.643854	7.86522e-11
Trim30a	-1.74304	7.9294e-11
Ablim1	-0.92801	8.52565e-11
Bdp1	-0.631295	8.99963e-11
Amdhd1	-4.29529	9.23567e-11
Hcls1	-1.13217	9.31062e-11
Trps1	-1.59786	9.8456e-11
Parp4	-0.491976	9.8456e-11
Psmb2	-0.527884	9.86715e-11
Enpp2	-2.03903	1.04541e-10
Gimap4	-1.86348	1.0935e-10
Mitd1	-0.797016	1.1518e-10
Dlg2	-1.82171	1.21089e-10
Cd28	-1.74729	1.22126e-10
Gyk	-1.3796	1.26228e-10
Nlrp1a	-1.14711	1.3068e-10
Ttc39b	-0.884323	1.4498e-10
Srpk1	-0.405358	1.45184e-10
Rab38	-2.23977	1.48638e-10
Cep83	-0.892452	1.50342e-10
C920021L13Rik	-1.37528	1.50456e-10
Nfyb	-0.740762	1.50456e-10
Dennd4a	-0.882442	1.51787e-10
Coa5	-0.585703	1.5911e-10
Lin9	-1.02597	1.6783e-10
Klra7	-1.80782	1.78404e-10
Il10ra	-1.11483	1.80837e-10
Il7r	-0.939035	1.81325e-10
Pcmtd1	-0.856976	1.81426e-10
Cwc22	-0.602615	1.88285e-10
Cytip	-1.08058	1.92694e-10
Slc25a37	-0.857369	1.93063e-10
Tank	-0.83894	2.02979e-10
Ube2f	-0.650451	2.0604e-10
Etaa1	-0.707127	2.07023e-10
Zcchc11	-0.784502	2.11338e-10
Serpinb9g	-5.52427	2.28246e-10
AI504432	-1.73431	2.51088e-10
Gabpb1	-0.789827	2.55907e-10
Mgst1	-0.948927	2.68872e-10
Zc3h13	-0.392176	2.91343e-10
Fbxl5	-1.0664	2.9902e-10
Gm16712	-1.17832	2.99994e-10
Atp10a	-0.801177	3.16472e-10
5031414D18Rik	-1.11962	3.29575e-10
Med13	-0.720122	3.38925e-10
Arhgap30	-0.87414	3.45273e-10
Stag1	-0.593278	3.59541e-10
Cnn3	-0.87023	3.76825e-10
Moxd1	-2.69935	3.86939e-10
Il24	-4.80109	4.00391e-10
Rufy3	-0.552029	4.01139e-10
Rtn3	-0.405429	4.09464e-10
Tmem67	-1.3422	4.21387e-10
Taf4a	-0.531735	4.33185e-10
Rbm3	-0.499369	4.73037e-10
Cdc5l	-0.536991	5.32424e-10
Ggct	-1.57653	5.96501e-10
Btaf1	-0.619864	5.99746e-10
Gtf2f2	-0.727279	6.31941e-10
Dapp1	-0.660018	6.37109e-10
Lnpep	-0.765317	6.61791e-10
Spop	-0.538743	6.95981e-10
Grem1	-2.12551	6.96286e-10
Lcp1	-1.07358	7.15693e-10
Elf1	-0.546565	7.36003e-10
Pde3b	-1.27367	7.71114e-10
Fyb	-1.1594	7.79481e-10
Lamp2	-0.568011	7.86967e-10
Pank2	-0.464758	8.31552e-10
Gpr132	-1.14636	8.50509e-10
Klre1	-1.87569	8.66797e-10
Ero1lb	-1.06356	8.83488e-10
Trem3	-2.07545	8.91986e-10
Prpf40a	-0.62186	9.86498e-10
2410127L17Rik	-0.69293	1.00126e-09
Pde7b	-1.18834	1.01398e-09
Pilrb1	-1.27089	1.02975e-09
Macf1	-0.504146	1.06209e-09
Aqr	-0.361811	1.08261e-09
Lyn	-0.953758	1.08393e-09
Aspg	-2.98969	1.08782e-09
Sowahc	-0.872505	1.1117e-09
Zfp207	-0.493485	1.11502e-09
Thoc2	-0.677537	1.19452e-09
Kif3b	-0.379449	1.2011e-09
Fbxw7	-0.749003	1.22606e-09
4932438A13Rik	-0.525926	1.26605e-09
Ctsc	-1.45199	1.34288e-09
Zdhhc21	-0.779762	1.36663e-09
Stk26	-1.53059	1.37218e-09
Rgs9	-1.67455	1.4095e-09
Utp3	-0.586419	1.41667e-09
Trim12a	-1.06667	1.44582e-09
Gpr18	-2.28355	1.46686e-09
Gpr84	-2.59344	1.48143e-09
Cnot6l	-0.616603	1.52907e-09
Txndc9	-0.549996	1.54701e-09
Cep350	-0.428522	1.57066e-09
Spn	-1.42891	1.67462e-09
Il1rl1	-1.52492	1.77617e-09
Nup153	-0.539956	1.86313e-09
Msrb1	-0.839654	1.89383e-09
Esco1	-0.669955	2.0275e-09
Ablim3	-1.43241	2.06473e-09
Aida	-0.7459	2.07185e-09
Runx3	-0.898299	2.09114e-09
Nampt	-1.64254	2.17631e-09
Klk1	-2.00835	2.19614e-09
Ercc6l2	-0.475712	2.33382e-09
Mndal	-1.17381	2.57322e-09
Pilra	-1.60158	2.6132e-09
Tpst2	-0.717073	2.63051e-09
Rab32	-0.663657	2.63735e-09
Top1	-0.686304	2.97613e-09
Atp6v1d	-0.736646	2.97613e-09
Phf6	-0.79362	2.98516e-09
Cd180	-1.38099	2.98619e-09
Slfn1	-2.0455	2.99449e-09
Sema4d	-1.36012	3.00288e-09
Msl2	-0.753467	3.01016e-09
Naip2	-0.649544	3.04193e-09
Rapgef6	-0.401986	3.10203e-09
Chst4	-2.41335	3.15939e-09
Tmpo	-0.668053	3.21216e-09
Arhgdib	-0.860665	3.25143e-09
Fam111a	-1.24693	3.41006e-09
AI847159	-2.00801	3.4719e-09
Icos	-1.84703	3.57129e-09
Prkcq	-1.35145	3.62056e-09
Smc3	-0.800617	3.95472e-09
Pdzd8	-0.712629	4.14279e-09
Tmed5	-0.981801	4.19171e-09
Sirpb1a	-2.37553	4.62262e-09
Glycam1	-3.72356	4.70613e-09
Ifih1	-1.02047	4.72518e-09
Pds5a	-0.535579	4.90907e-09
Zfand4	-1.36795	4.90907e-09
Stim2	-0.750272	4.97156e-09
Rbbp8	-1.07599	5.01119e-09
Psma2	-0.487393	5.0307e-09
Eif4e3	-1.11495	5.05162e-09
Satb1	-1.62669	5.12362e-09
Csf2rb2	-1.15653	5.14118e-09
Apool	-0.546527	5.41499e-09
Il18bp	-1.37913	5.51728e-09
Ppp1r7	-0.365692	5.51728e-09
Srsf10	-0.691104	5.63588e-09
Rassf5	-0.769592	5.76951e-09
Tox4	-0.448305	5.79192e-09
Cse1l	-0.696972	5.81327e-09
Tmevpg1	-2.61438	6.14944e-09
Smc6	-0.691255	6.75219e-09
Setd8	-0.461811	7.31276e-09
Sumo1	-0.683085	7.87302e-09
Eomes	-1.71682	8.11397e-09
Gtdc1	-0.520219	8.16855e-09
Psmc3	-0.485732	8.25862e-09
Sltm	-0.515723	8.35819e-09
Klra6	-2.72679	8.93257e-09
Whsc1	-0.580562	9.07092e-09
Gm614	-2.00129	9.28713e-09
Cmpk2	-1.66377	9.28713e-09
Tmem161b	-0.73097	9.63658e-09
Trim30b	-2.34809	9.67294e-09
Ccnh	-0.510627	9.81036e-09
Zfp503	-1.27077	9.85366e-09
Mlkl	-1.08415	9.98123e-09
Crtam	-1.77812	1.01735e-08
Brip1	-1.51631	1.02949e-08
Cd40	-1.49626	1.05249e-08
Hnrnpm	-0.523071	1.06122e-08
Csnk2b	-0.547147	1.06868e-08
Ptbp3	-0.899039	1.07254e-08
Ube2k	-0.508546	1.08583e-08
Rad17	-0.644554	1.09568e-08
Pdcd10	-0.57777	1.10479e-08
Fst	-2.2666	1.12777e-08
Serpina3g	-1.74372	1.12862e-08
Abr	-0.612371	1.16968e-08
Zfp120	-0.70249	1.19902e-08
Cyfip2	-1.59085	1.21997e-08
Vcpkmt	-0.824227	1.22464e-08
Psmd12	-0.546868	1.23151e-08
Vdr	-2.21885	1.23415e-08
Sf3b6	-0.558313	1.26969e-08
Tmem30a	-0.639663	1.271e-08
Trpv2	-0.724278	1.28896e-08
Ola1	-0.718389	1.28896e-08
Zmat2	-0.524492	1.28896e-08
Ogfr	-0.707788	1.29226e-08
Caprin1	-0.553837	1.2926e-08
Upf2	-0.585254	1.32794e-08
Acadl	-0.760398	1.32969e-08
Gm6548	-0.598356	1.33673e-08
Acp2	-0.573387	1.37965e-08
Cd47	-0.629914	1.41277e-08
Aftph	-0.427371	1.43534e-08
Vti1a	-0.416512	1.4771e-08
Sprr2g	-4.92138	1.55357e-08
1110037F02Rik	-0.272434	1.57087e-08
Prr5l	-1.14528	1.57087e-08
Dnajc8	-0.669482	1.57844e-08
Nmt1	-0.392342	1.58346e-08
Ddx52	-0.416484	1.62116e-08
Gfi1	-1.24078	1.6502e-08
Atp2b4	-0.959957	1.67006e-08
Gid8	-0.481547	1.72073e-08
Arel1	-0.734138	1.7744e-08
Fmnl1	-0.803169	1.81075e-08
Gm9199	-1.93264	1.88232e-08
Pag1	-0.633622	2.01428e-08
Edem1	-0.558383	2.02111e-08
Clec4e	-3.10327	2.05078e-08
Pdia3	-0.556425	2.05088e-08
Mx1	-1.43033	2.05983e-08
Gimap7	-2.01701	2.06252e-08
Pinx1	-0.833353	2.14612e-08
Kcna3	-1.02808	2.19016e-08
Rap2c	-0.966981	2.20618e-08
Pqlc3	-0.902871	2.23707e-08
Heatr9	-2.05566	2.23707e-08
Tmx3	-0.727875	2.25555e-08
Tigit	-1.77512	2.28022e-08
Fcer1g	-1.33887	2.28316e-08
Itk	-1.64903	2.35795e-08
Nme7	-0.570309	2.36144e-08
Nipbl	-0.518392	2.37325e-08
Stx16	-0.370903	2.52333e-08
U2af1	-0.488858	2.54221e-08
Evi2a	-0.890192	2.57331e-08
Rpf1	-0.677084	2.5988e-08
Slc8a1	-1.13111	2.59915e-08
Gm5431	-1.20251	2.60721e-08
Gbp9	-1.27279	2.68014e-08
Map2k4	-0.577598	2.69325e-08
Mis12	-0.578932	2.79008e-08
Padi2	-1.01085	2.81428e-08
Ric1	-0.824741	2.89463e-08
Bloc1s6	-0.432029	2.9404e-08
Psme4	-0.432458	2.98627e-08
Adam17	-0.698894	2.99513e-08
Cd274	-1.68747	3.02966e-08
Rlim	-0.589029	3.09698e-08
Crem	-0.861781	3.11533e-08
Ncr1	-1.8415	3.20479e-08
Erp44	-0.660446	3.25105e-08
Pacsin1	-1.5143	3.44979e-08
Ptk2b	-0.699839	3.51881e-08
Acot9	-0.52127	3.53245e-08
Dyrk1a	-0.433565	3.65712e-08
Foxn2	-0.696877	3.78622e-08
Mospd2	-0.543939	3.90189e-08
Mtf2	-0.768863	3.93874e-08
Ppil4	-0.545037	3.97202e-08
A930015D03Rik	-0.954761	4.12857e-08
Vps13a	-0.823054	4.21554e-08
Oasl2	-1.42359	4.44843e-08
Sfrp1	-2.11582	4.57057e-08
Fhod3	-1.3169	4.60135e-08
Fpr2	-2.6174	4.64452e-08
Cd40lg	-1.84381	5.00498e-08
Atad1	-0.780311	5.20253e-08
Meis1	-0.718356	5.22592e-08
Cenpl	-0.908195	5.30209e-08
Snrpd1	-0.790868	5.73097e-08
Tgfbi	-1.5927	5.75094e-08
Nsmce2	-0.642024	5.88212e-08
Cnih4	-0.59706	6.15378e-08
Snx20	-0.98875	6.20293e-08
Cd200r3	-1.50881	6.35645e-08
Pitpnb	-0.485185	6.47004e-08
Hnrnpu	-0.481599	6.49669e-08
Ifi203	-1.18917	6.50346e-08
Tnf	-1.54898	6.52828e-08
Wdr76	-1.07104	6.54104e-08
Ugt1a6b	-1.69287	6.56256e-08
Ube2e3	-0.364663	6.56256e-08
Camk1d	-0.735229	6.88865e-08
Pilrb2	-0.930965	6.88865e-08
Dnah8	-1.45116	7.00623e-08
Klra17	-1.95685	7.01435e-08
Pik3cb	-0.761783	7.01527e-08
Psip1	-0.854561	7.40613e-08
3830406C13Rik	-0.671846	7.45663e-08
2700099C18Rik	-1.40454	7.80159e-08
Lin7c	-0.596874	7.93793e-08
Tmem68	-0.576782	8.32058e-08
Slamf8	-1.9007	8.39703e-08
Klrb1c	-1.75164	8.42546e-08
Selplg	-0.787332	8.94043e-08
Zfp595	-0.714968	8.98688e-08
Slc6a19	-2.07173	8.98688e-08
Tmed8	-0.83299	9.23222e-08
Rdx	-0.530056	9.33022e-08
Evl	-0.879804	1.02305e-07
C1rl	-0.895025	1.03087e-07
Gm12596	-1.51843	1.07159e-07
Chsy3	-1.39712	1.07773e-07
Acsl1	-1.5166	1.07834e-07
Esf1	-0.749173	1.08435e-07
AI414108	-2.2928	1.10447e-07
Cep290	-0.821749	1.14271e-07
Tmem168	-0.480909	1.15946e-07
Procr	-1.09791	1.16113e-07
Itgb2	-1.05303	1.16207e-07
Nusap1	-1.40394	1.16932e-07
Ccr2	-1.08242	1.18696e-07
Otud1	-1.12456	1.18975e-07
Arrdc4	-0.932539	1.22938e-07
Chpt1	-0.674228	1.24068e-07
Zbtb33	-0.482433	1.27429e-07
Psmc6	-0.618937	1.27497e-07
Lrrc63	-3.50625	1.27903e-07
Trmt6	-0.674691	1.30464e-07
Slamf1	-1.51552	1.31775e-07
Psat1	-1.18308	1.34516e-07
Cep152	-0.640437	1.3495e-07
Casp7	-0.823082	1.38858e-07
Cenpj	-1.03639	1.42261e-07
Snrpc	-0.499676	1.44178e-07
Nuf2	-1.29341	1.44178e-07
Ddx4	-1.81991	1.45821e-07
Wdr43	-0.638176	1.51396e-07
Bak1	-0.668453	1.56798e-07
2610524H06Rik	-0.691587	1.5865e-07
Cenpi	-1.37872	1.58705e-07
Gmfg	-1.17089	1.62387e-07
Med14	-0.664382	1.64162e-07
Rbm41	-0.636193	1.70142e-07
D630045J12Rik	-1.10278	1.7383e-07
Ms4a4d	-1.81559	1.73838e-07
Sytl3	-1.42619	1.77887e-07
Rab10	-0.477935	1.80971e-07
Nkg7	-1.57223	1.81595e-07
Mta3	-0.586016	1.82609e-07
Kirrel	-0.48835	1.84695e-07
Gimap8	-1.6558	1.84695e-07
Slc30a4	-0.803063	1.86181e-07
Psmb1	-0.402302	1.9072e-07
Fanci	-0.991262	1.91329e-07
Naa25	-0.791521	1.92342e-07
Fli1	-1.06034	1.96628e-07
Plaa	-0.486475	1.97438e-07
Gm8221	-2.63608	1.97646e-07
AW011738	-1.12127	2.11579e-07
5530601H04Rik	-0.652078	2.12804e-07
Gm16675	-0.683639	2.20223e-07
Sass6	-1.06644	2.21111e-07
Pphln1	-0.662636	2.21575e-07
Sept1	-1.13375	2.36637e-07
Ifi44	-1.58985	2.38707e-07
Cenph	-1.63834	2.39524e-07
Cacul1	-0.518529	2.41889e-07
Lpar6	-0.677679	2.41889e-07
Gbp8	-1.84338	2.42094e-07
Ikzf3	-1.32642	2.42094e-07
Plcxd2	-0.615248	2.47693e-07
M6pr	-0.455836	2.48192e-07
Pecam1	-0.933474	2.48233e-07
Gkap1	-0.949237	2.49422e-07
Rbbp5	-0.372709	2.49826e-07
Atp7a	-0.862968	2.5039e-07
Cd27	-1.66365	2.58874e-07
Mycbp2	-0.692021	2.60452e-07
Gtf2a1	-0.730852	2.61244e-07
Dut	-1.2468	2.63282e-07
Slc7a11	-1.75863	2.69391e-07
Ncoa7	-0.622954	2.78124e-07
Zfp758	-0.662066	2.82918e-07
Arhgef37	-2.23988	2.90952e-07
Smc5	-0.692458	2.91057e-07
Ik	-0.411998	2.91095e-07
Ppp6c	-0.497733	2.919e-07
Man2a1	-0.758617	2.97625e-07
Mbip	-0.674657	2.98924e-07
Treml4	-1.85823	2.99652e-07
Cep135	-0.624829	3.01681e-07
Rbm27	-0.502599	3.02975e-07
Nsdhl	-0.557709	3.03376e-07
Stx3	-0.894306	3.04261e-07
Ifit1	-1.70045	3.10595e-07
Diap2	-0.662071	3.15034e-07
Rprd1b	-0.485283	3.21829e-07
Stat1	-1.4342	3.25513e-07
Nrd1	-0.479918	3.28532e-07
Fbxo11	-0.72807	3.29883e-07
Alox8	-2.3893	3.44195e-07
Nsg2	-2.13676	3.44527e-07
Sgol2a	-1.55069	3.52673e-07
AW112010	-1.92688	3.53685e-07
Sod2	-1.48523	3.57477e-07
Gtf2f1	-0.455335	3.62592e-07
Prkch	-0.915235	3.67602e-07
Fnbp4	-0.602479	3.69172e-07
C1s2	-1.55	3.79378e-07
Capza2	-0.54324	3.81919e-07
Lsm5	-0.973823	3.82835e-07
Mpeg1	-1.27764	4.11235e-07
Cript	-0.508332	4.12502e-07
Minpp1	-0.475933	4.18619e-07
Ctps2	-0.664384	4.21292e-07
Ube2l6	-1.27866	4.31037e-07
Ncoa2	-0.355203	4.40156e-07
Ptcd2	-0.542942	4.44788e-07
Cul3	-0.585724	4.54744e-07
Shfm1	-0.563186	4.6295e-07
Cpsf6	-0.40068	4.64193e-07
Arg2	-2.4065	4.7623e-07
Trappc8	-0.506687	5.0321e-07
Brip1os	-0.537038	5.14613e-07
Pde1a	-1.35822	5.14613e-07
Acsl4	-1.3642	5.14696e-07
Cd200	-0.936373	5.24251e-07
Trafd1	-0.941907	5.31589e-07
Eif3e	-0.390331	5.58584e-07
Fam26f	-2.11916	5.59059e-07
Cntrl	-0.599455	5.64362e-07
Ly6a	-0.984782	5.64709e-07
Bnc1	-3.16439	5.76643e-07
Inpp5b	-0.610638	5.81199e-07
A430093F15Rik	-1.61893	5.96e-07
Skap2	-0.553023	6.06339e-07
Cenpq	-1.17819	6.14457e-07
Bst1	-1.71711	6.18707e-07
Gm13154	-1.85857	6.25421e-07
Phip	-0.702031	6.36694e-07
Riok1	-0.685915	6.48554e-07
Mtmr6	-0.530043	6.50433e-07
Epb4.1	-0.541896	6.55099e-07
St8sia4	-0.801642	6.63207e-07
Tsga10	-0.803546	6.71114e-07
Fam188a	-0.727203	6.88512e-07
BC100530	-6.18898	6.96373e-07
A230028O05Rik	-1.93053	7.0189e-07
Phf11d	-1.35932	7.05417e-07
Lipo1	-0.650179	7.08946e-07
Cd226	-1.16322	7.09491e-07
Arhgap11a	-0.950649	7.13983e-07
Ndufv2	-0.396952	7.34936e-07
Azi2	-0.534421	7.41916e-07
Acap1	-0.835329	7.43655e-07
Clcn7	-0.838434	7.5546e-07
Cd72	-1.13299	7.61902e-07
Ccnc	-0.779685	7.66435e-07
Myb	-1.73254	7.68647e-07
Il1b	-2.2733	7.69515e-07
Actb	-0.482518	7.72303e-07
Rnase6	-1.02449	8.03455e-07
Tmsb15a	-3.6102	8.12057e-07
Psmd1	-0.438805	8.42539e-07
Ranbp9	-0.506232	8.69627e-07
Tarm1	-2.43501	9.02996e-07
Usp15	-0.414036	9.08627e-07
Ergic2	-0.386726	9.32102e-07
Trappc1	-0.371303	9.39595e-07
Dbf4	-0.967485	9.74352e-07
Atad2	-1.17498	9.74352e-07
Tbl1xr1	-0.617398	9.80816e-07
Gpbp1	-0.652758	9.80816e-07
Tcf20	-0.291675	9.97095e-07
Rev3l	-0.439614	1.00144e-06
Gpr174	-1.92412	1.00607e-06
Csn3	-4.57312	1.04592e-06
Il20ra	-2.53592	1.06945e-06
Fbxo5	-1.05967	1.07334e-06
Inpp5j	-0.809664	1.07544e-06
Hells	-1.50016	1.10245e-06
Spo11	-1.8314	1.13596e-06
Sp4	-0.74822	1.13596e-06
Fcf1	-0.449505	1.1586e-06
Armcx5	-0.615926	1.16356e-06
Klra23	-1.7774	1.16624e-06
Arl5a	-0.581415	1.20101e-06
Erap1	-1.03385	1.20244e-06
Ift57	-0.65302	1.21584e-06
Gm10436	-4.11149	1.21584e-06
Haus7	-0.773625	1.24083e-06
Rab9	-0.600094	1.25697e-06
Marcksl1	-0.707065	1.26886e-06
Zc3hav1	-0.521377	1.32211e-06
Zfp729b	-0.534212	1.33977e-06
Xist	-0.576294	1.34007e-06
Lnp	-0.685188	1.3648e-06
Cetn2	-0.711226	1.38471e-06
Zfp429	-0.697135	1.38512e-06
Sdad1	-1.36342	1.38673e-06
Polh	-0.621016	1.39398e-06
Slamf7	-1.35557	1.43655e-06
Ube2l3	-0.372431	1.43798e-06
Sptlc2	-0.38533	1.44083e-06
Fam204a	-0.846353	1.45286e-06
Ccdc88a	-0.671193	1.46056e-06
Cd247	-1.53469	1.46814e-06
Zfp280c	-0.527538	1.47023e-06
Frg1	-0.496503	1.47644e-06
Tmem87a	-0.479564	1.47708e-06
Gpalpp1	-0.449818	1.48789e-06
Gbp11	-2.31136	1.50682e-06
Fetub	-2.86226	1.52753e-06
Kynu	-1.74937	1.52936e-06
Smek1	-0.636634	1.52945e-06
Gm10509	-0.719794	1.53731e-06
1200014J11Rik	-0.346613	1.54679e-06
Kdm7a	-0.727744	1.58942e-06
Atf7ip	-0.481032	1.63427e-06
Apol7c	-2.28622	1.63427e-06
Gm3414	-0.680606	1.65562e-06
Wnt6	-1.76523	1.67363e-06
Klra3	-1.88853	1.68191e-06
Dnajb6	-0.524888	1.69047e-06
Adgrg5	-1.58144	1.69106e-06
Prim1	-0.962146	1.70505e-06
Cetn3	-0.552249	1.70961e-06
Chd7	-1.20586	1.74622e-06
BC030336	-0.566585	1.75461e-06
Herc6	-1.318	1.81005e-06
Dync1i2	-0.535664	1.81159e-06
Nono	-0.343475	1.81966e-06
Nemf	-0.554365	1.82615e-06
Sos1	-0.544062	1.82615e-06
Pbrm1	-0.371873	1.83068e-06
Dcun1d1	-0.654511	1.88991e-06
Psmd14	-0.534772	1.92449e-06
Pten	-0.692401	1.93087e-06
Slc25a40	-0.568747	1.96112e-06
Lbr	-0.664896	2.00838e-06
Msh6	-0.704986	2.00952e-06
Faim	-0.479741	2.01209e-06
Mrpl18	-0.521974	2.01427e-06
Clec4a3	-1.07015	2.02232e-06
Top2b	-0.566291	2.06298e-06
Parg	-0.451048	2.11583e-06
Sgms1	-0.646859	2.11705e-06
A830080D01Rik	-0.676183	2.14057e-06
Znfx1	-0.820125	2.15699e-06
Zfp518a	-0.584638	2.16427e-06
Asah2	-0.649233	2.16996e-06
Cdc45	-0.999829	2.1716e-06
Papola	-0.468912	2.18832e-06
Prkar1a	-0.431835	2.19247e-06
Eif3m	-0.431794	2.23554e-06
Ssbp2	-0.877955	2.24923e-06
Nol7	-0.50509	2.32125e-06
Sla	-0.812502	2.33912e-06
Itgal	-1.41649	2.50901e-06
Taok1	-0.522798	2.50913e-06
Rpp30	-0.819097	2.50913e-06
Usp25	-0.6102	2.50913e-06
Eif2s2	-0.80588	2.56806e-06
Traf5	-0.546963	2.58793e-06
Ankrd1	-1.19352	2.6438e-06
D17H6S56E-5	-0.822322	2.70188e-06
Arl14ep	-0.40062	2.70967e-06
Ncapg2	-1.04805	2.77223e-06
Cd96	-1.5818	2.80309e-06
Pot1b	-0.647265	2.8099e-06
Lst1	-0.983396	2.92963e-06
Hk3	-1.5235	2.94218e-06
Spata5	-0.571606	2.94375e-06
Vma21	-0.702009	2.94891e-06
Dcp2	-0.431618	2.95725e-06
Adap2	-0.871327	2.97855e-06
Fra10ac1	-0.554168	3.02979e-06
Skap1	-1.33138	3.08029e-06
Trmt5	-0.413374	3.10554e-06
Nkap	-0.479701	3.10944e-06
Zfp273	-0.895343	3.11479e-06
Slco4a1	-1.56185	3.11933e-06
Lrrc16a	-1.02739	3.20806e-06
Sec23b	-0.398543	3.21995e-06
Kcnj2	-1.38426	3.25545e-06
Zfp367	-0.679416	3.26182e-06
Def6	-0.577334	3.33689e-06
Dock10	-0.843995	3.3778e-06
Psma6	-0.429822	3.41722e-06
Slc31a1	-0.687116	3.44214e-06
Fmr1	-0.525995	3.44426e-06
Srsf1	-0.591511	3.45044e-06
Sbno1	-0.362412	3.47733e-06
Pbx1	-0.511687	3.55718e-06
Dnase1l3	-1.99827	3.60408e-06
Gpcpd1	-0.463312	3.64277e-06
Lrif1	-0.606135	3.65099e-06
Car12	-2.39857	3.75074e-06
Slain1	-1.71996	3.75263e-06
Nap1l1	-0.486066	3.78963e-06
Sash3	-0.780276	3.87205e-06
Cep192	-0.59066	3.88127e-06
G3bp2	-0.494991	3.91142e-06
Rasa3	-0.408875	3.91225e-06
4933433H22Rik	-1.96399	3.92162e-06
Ints8	-0.466065	3.92162e-06
Grp	-3.31634	3.93914e-06
Sh2d1b1	-1.12373	3.94253e-06
Glcci1	-0.768889	3.94735e-06
Gm11992	-3.05068	3.99605e-06
Gpm6b	-1.6399	4.09458e-06
Klra13-ps	-2.00333	4.11952e-06
Brinp3	-1.80394	4.125e-06
Ifi204	-1.5954	4.13397e-06
Tcf7l2	-0.722567	4.17933e-06
Zfp942	-0.567318	4.17933e-06
Emd	-0.435318	4.28499e-06
Xpr1	-0.486466	4.33883e-06
Stat2	-0.842959	4.37045e-06
Ddx46	-0.422705	4.3789e-06
Plekhf2	-0.687997	4.42334e-06
Mcm8	-1.08226	4.44399e-06
Bin2	-0.898679	4.48521e-06
H2-L	-0.703578	4.53005e-06
C1galt1c1	-0.454318	4.60446e-06
Etf1	-0.454735	4.61972e-06
Wapal	-0.464169	4.70617e-06
Serpinb9	-1.46951	4.72192e-06
Epas1	-0.766335	4.72281e-06
Rpe	-0.571116	4.73781e-06
Atl3	-0.435299	4.80226e-06
Gbp4	-2.02968	4.81468e-06
Casc5	-1.38155	4.82102e-06
Cybb	-0.90072	4.82102e-06
Kif20b	-1.37162	4.97878e-06
Wdr44	-0.463607	5.02211e-06
Chmp4b	-0.370328	5.03067e-06
Emb	-1.64971	5.03503e-06
Clic5	-0.8565	5.04078e-06
Psmc1	-0.359359	5.07752e-06
Gm19589	-2.11751	5.17869e-06
Lrrc4	-2.32354	5.37135e-06
L1cam	-0.961098	5.37662e-06
Mki67	-1.08064	5.46965e-06
Phf11a	-1.17278	5.47506e-06
Zfp51	-0.610066	5.52173e-06
Ercc6l	-1.21649	5.52173e-06
Fut7	-1.19118	5.54983e-06
Mnda	-1.47789	5.59593e-06
Hdac1	-0.403146	5.64624e-06
Emx2	-0.694157	5.69399e-06
Esco2	-1.40598	5.74489e-06
Kif18a	-1.18397	5.82988e-06
Ly6c1	-1.1429	5.83186e-06
Kctd19	-2.50843	5.85483e-06
Smc4	-0.739557	5.95901e-06
Ankrd44	-0.725152	5.96244e-06
P2ry13	-0.848143	6.01658e-06
Lef1	-1.76835	6.03437e-06
Samd3	-1.93023	6.06614e-06
Isg15	-1.41265	6.4665e-06
Ube2d2a	-0.445944	6.58666e-06
Fam208a	-0.550837	6.63174e-06
Sgol1	-1.34287	6.71432e-06
Itgb7	-1.21269	6.77887e-06
Cbfb	-0.547971	6.7923e-06
Atad5	-0.899152	6.83455e-06
Serpina3f	-2.26944	6.84677e-06
Tnfaip8l3	-2.18412	6.93216e-06
Rngtt	-0.452367	7.12215e-06
Slc44a5	-3.34243	7.13245e-06
Secisbp2l	-0.663719	7.13245e-06
Fgfr1op	-0.609397	7.24397e-06
Calm1	-0.410925	7.24666e-06
Ppp1r12a	-0.368591	7.35058e-06
Unc79	-2.31132	7.56133e-06
Arf6	-0.500721	7.66615e-06
Gimap3	-1.40884	7.9442e-06
Hmgn2	-0.482406	8.07568e-06
Tra2b	-0.420851	8.5221e-06
Gsap	-0.692116	8.55708e-06
Ermn	-3.24556	8.56498e-06
Pola1	-1.07162	8.56556e-06
Rab37	-0.797037	8.63325e-06
Daxx	-0.813242	8.71139e-06
Dnajc2	-0.609886	8.71139e-06
Gdap10	-1.2871	8.74958e-06
Klhdc8a	-1.27248	8.7572e-06
Ltbp1	-1.43522	8.77969e-06
Ifi30	-0.746067	8.79024e-06
Myo1f	-0.790185	8.84144e-06
Immp1l	-0.381117	8.86998e-06
Specc1	-0.872648	8.87239e-06
Ddias	-0.913407	8.88263e-06
Gm4759	-1.95321	8.91661e-06
Lin54	-0.729236	8.93943e-06
Zfp953	-0.707069	9.08332e-06
Cenpc1	-0.459622	9.13793e-06
Sox11	-2.13829	9.36436e-06
Lsm3	-0.509368	9.37818e-06
Pde4b	-0.891883	9.38643e-06
Top2a	-1.28076	9.47491e-06
Rab5a	-0.482026	9.48944e-06
Dock8	-0.741272	9.6646e-06
Pip4k2a	-0.54642	9.68285e-06
Cpsf3	-0.268614	9.94339e-06
