# Supplementary material for: Deep immunophenotyping at the single-cell level identifies a combination of anti-IL-17 and checkpoint blockade as an effective treatment in a preclinical model of data-guided personalized immunotherapy
Source: PubMed Central journal article supplement — J Immunother Cancer. 2020 Oct 22;8(2):e001358. doi: 10.1136/jitc-2020-001358 (PMC7583806; doi:10.1136/jitc-2020-001358), 2020-10-22
Supplement: jitc-2020-001358supp008.pdf [file jitc-2020-001358supp008.pdf]

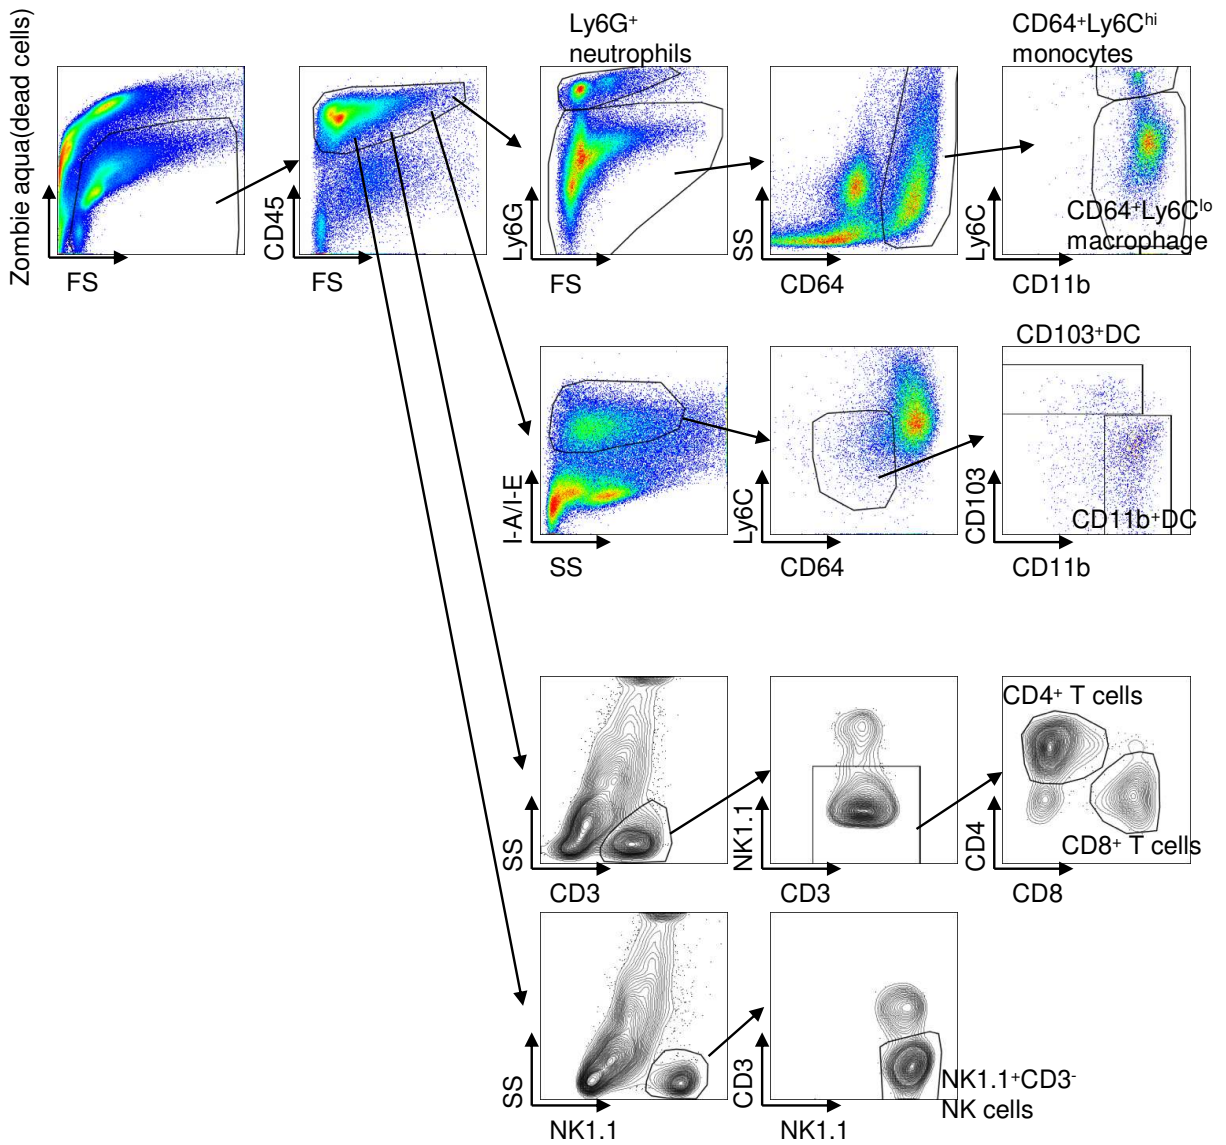

### Supplementary Figure 1. Gating strategy.

Mice were treated as Figure 2 legend. gating strategies to identify indicated cell populations were shown.

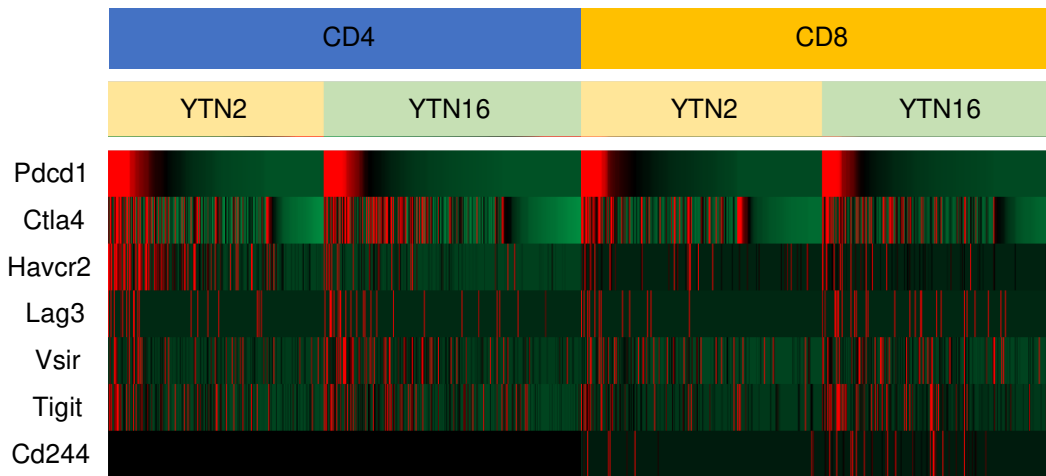

**Supplementary Figure 2. Expressions of inhibitory molecules in CD4<sup>+</sup> and CD8<sup>+</sup> tumor infiltrating cells.**

Mice were treated as Figure 3 legend. Heatmap shows expression of indicated genes.



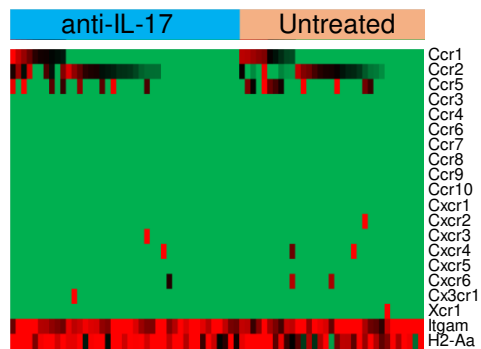

**Supplementary Figure 4. Expression of chemokine receptors in CD11b<sup>+</sup> DCs.** Mice were treated as Figure 6. CD45<sup>+</sup> cells were sorted and subjected to single-cell RNA-Seq. Expression of chemokine receptors of CD11b<sup>+</sup> DC were shown.
