# Supplementary material for: Deep immunophenotyping at the single-cell level identifies a combination of anti-IL-17 and checkpoint blockade as an effective treatment in a preclinical model of data-guided personalized immunotherapy
Source: HighWire-hosted journal article supplement (doi:10.1136/jitc-2020-001358), 2020-10-01
Supplement: jitc-2020-001358supp009_data_supplement.xlsx [file jitc-2020-001358supp009_data_supplement.xlsx]

## Sheet: YTN2_top_500_genes
Supplementary Table 8. KEGG pathways analysis of genes highly expressed in YTN2 cell line.
Pathway	P	Genes
Cytokine-cytokine receptor interaction	2.1648e-08	Cxcl1, Il6, Il18rap, Ccl2, Cxcl5, Osmr, Csf1, Lepr, Cxcl2, Ccl9, Ccl8, Ccl7, Cxcl10, Acvr1b, Ppbp, Cxcl15, Ccl27a, Eda, Bmp7, Csf2Ra
TNF signaling pathway	2.13575e-06	Cxcl1, Il6, Ccl2, Ptgs2, Mapk13, Csf1, Cxcl3, Cxcl2, Edn1, Mmp3, Traf5, Cxcl10
Transcriptional misregulation in cancer	0.000486649	Maf, Hhex, Il6, Uty, Itgb7, Six1, Igf1, Six4, Hmga2, Mmp3, Plau
Chemokine signaling pathway	0.000489903	Cxcl1, Ccl2, Ppbp, Cxcl5, Cxcl3, Cxcl15, Cxcl2, Ccl9, Ccl27a, Ccl8, Ccl7, Cxcl10
Glycosaminoglycan biosynthesis - chondroitin sulfate / dermatan sulfate	0.0044537	Chsy3, Chst11, Chst13, Chst15
Rheumatoid arthritis	0.0127356	Il6, Ccl2, Cxcl5, Csf1, Mmp3, Atp6v0a4
Amoebiasis	0.014611	Il6, Col4a1, Lamc3, Serpinb9g, Serpinb9f, Serpinb9e, Col5a1
Legionellosis	0.015836	Cxcl1, Il6, C3, Cxcl3, Cxcl2
NOD-like receptor signaling pathway	0.015836	Cxcl1, Il6, Ccl2, Mapk13, Cxcl2
Chemical carcinogenesis	0.020081	Ptgs2, Cyp2c44, Cyp1a1, Ugt1a6b, Aldh1a3, Mgst1
Cell adhesion molecules (CAMs)	0.0204366	Tigit, Nrcam, Ncam1, Cadm1, Cldn3, Itgb7, Cldn2, Sdc3
Metabolism of xenobiotics by cytochrome P450	0.0232685	Cyp1a1, Ugt1a6b, Aldh1a3, Cbr3, Mgst1
Pathways in cancer	0.036432	Fgfr1, Tcf7, Il6, Col4a1, Epas1, Ptgs2, Igf1, Fgf13, Wnt7b, Lamc3, Axin2, Traf5, Csf2ra
Salmonella infection	0.0436392	Cxcl1, Il6, Mapk13, Cxcl3, Cxcl2
