# Supplementary material for: Deep immunophenotyping at the single-cell level identifies a combination of anti-IL-17 and checkpoint blockade as an effective treatment in a preclinical model of data-guided personalized immunotherapy
Source: HighWire-hosted journal article supplement (doi:10.1136/jitc-2020-001358), 2020-10-01
Supplement: jitc-2020-001358supp011_data_supplement.xlsx [file jitc-2020-001358supp011_data_supplement.xlsx]

## Sheet: Sheet1
Supplementary Table 10. Clusters identified by droplet-based scRNA-Seq
Cluster number	subset	untreated	anti-IL-17	Total
0	Myeloid	442	648	1090
1	Myeloid	359	720	1079
2	CD4,CD8	527	524	1051
3	NK	415	441	856
4	Myeloid	310	442	752
5	Neutrophil	359	277	636
6	DC	281	329	610
7	CD8	308	235	543
8	CD4	247	263	510
9	Proliferating cells (CD4,CD8,NK)	164	164	328
10	Myeloid	144	109	253
11	Treg	114	104	218
12	Mreg DC	52	51	103
13	NKT	48	40	88
14	mast cells	21	44	65
15		7	25	32
	Total	3798	4416	8214
