# Supplementary material for: Deep immunophenotyping at the single-cell level identifies a combination of anti-IL-17 and checkpoint blockade as an effective treatment in a preclinical model of data-guided personalized immunotherapy
Source: PubMed Central journal article supplement — J Immunother Cancer. 2020 Oct 22;8(2):e001358. doi: 10.1136/jitc-2020-001358 (PMC7583806; doi:10.1136/jitc-2020-001358), 2020-10-22
Supplement: jitc-2020-001358supp012.pdf [file jitc-2020-001358supp012.pdf]

## Deep-immunophenotyping at the single-cell level identifies a combination of anti-IL-17 and checkpoint blockade as an effective treatment in a preclinical model of data-guided personalized immunotherapy.

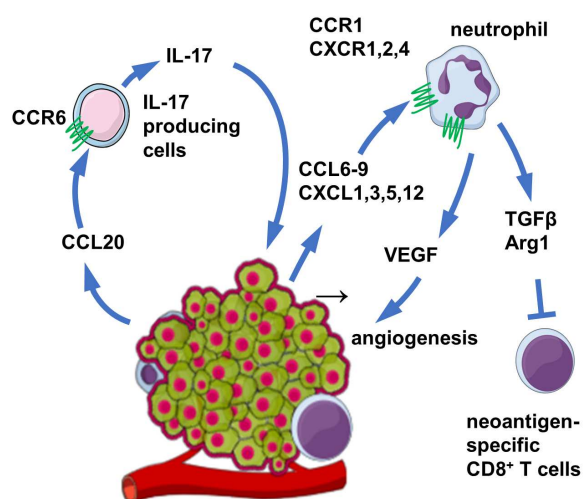

### Authors

Koji Nagaoka, Masataka Shirai, Kiyomi Taniguchi, Akihiro Hosoi, Changbo Sun, Yukari Kobayashi, Kazuhiro Maejima, Masashi Fujita, Hidewaki Nakagawa, Sachiyo Nomura and Kazuhiro Kakimi

### Correspondence

kakimi@m.u-tokyo.ac.jp,

### In Brief

Deep phenotyping of YTN16 tumors identified a sequence of events on the axis CCL20→IL-17-producing cells → IL-17 → neutrophil → angiogenesis and suppression of neoantigen-specific CD8<sup>+</sup> T cells which was responsible for the lack of tumor rejection.
